# Supplementary material
Source: MDPI journal article supplement (https://www.mdpi.com/2073-4441/12/4/1081)
Supplement: s1 [file s1]

## **Supplementary Material**

### **1 Common Events in NBC and PBC**

Figs S1 and S2 below show the event hydrographs for NP1-NP17 in both catchments. The top figure shows events in the NBC and the lower set in the PBC. The blue solid line shows TP and the blue dashed line TRP concentrations. The red solid line shows  $q$  (runoff in units of mm/hr on the right hand y-axis).

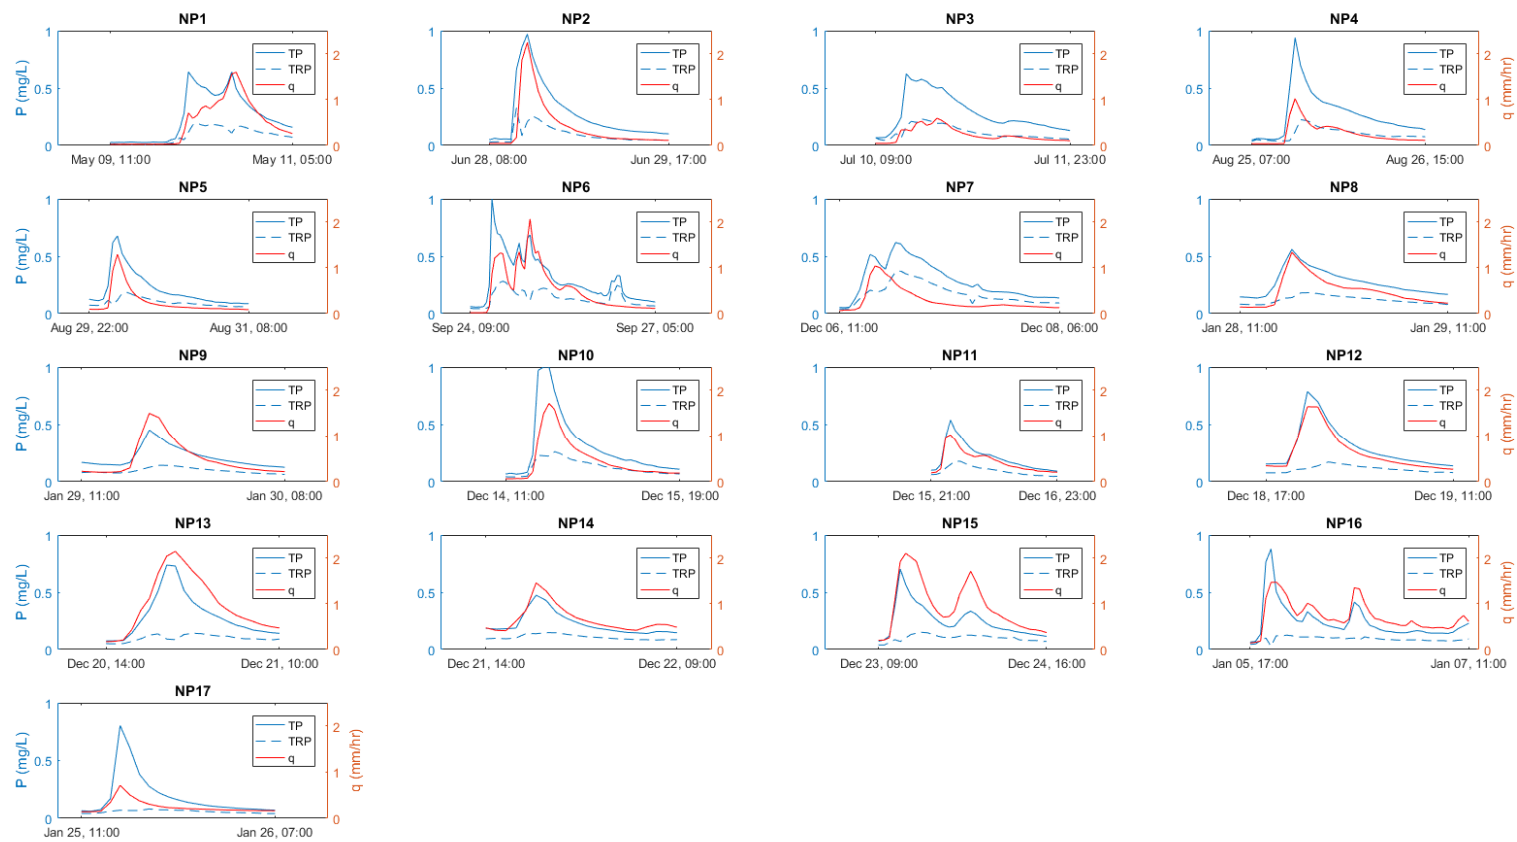

Fig S1 Plots of P concentration and runoff (q) for all “NP Events” for NBC catchment.

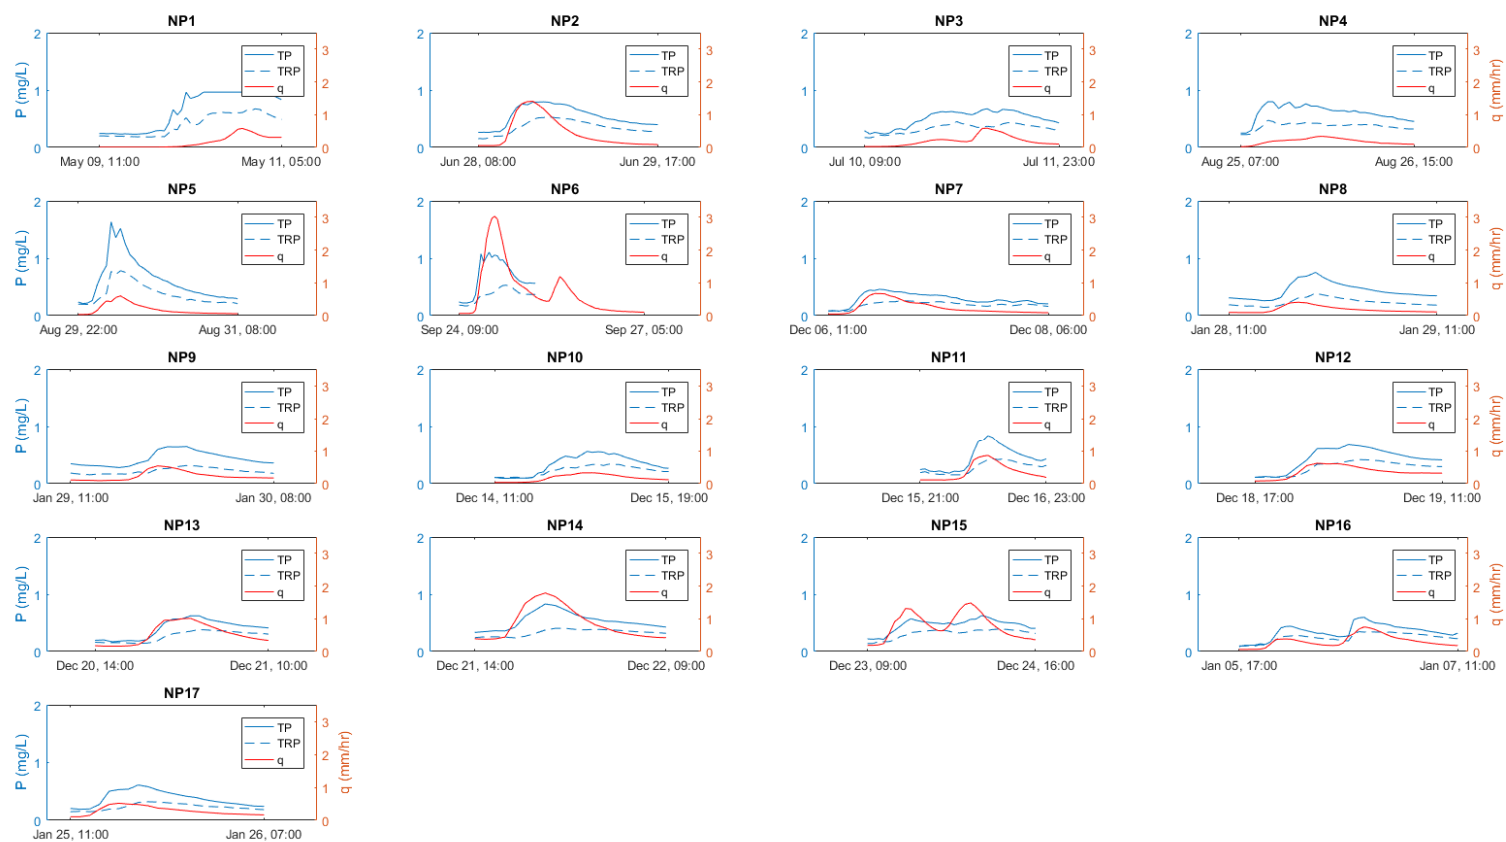

Fig S2 Plots of P concentration and runoff (q) for all “NP Events” for PBC catchment
